# Supplementary material for: Oscillating light engine realized by photothermal solvent evaporation
Source: PubMed Central journal article supplement (PMC9509359; doi:10.1038/s41467-022-33374-x), 2022-09-24
Supplement: 41467_2022_33374_MOESM1_ESM.pdf [file 41467_2022_33374_MOESM1_ESM.pdf]

24 **Supplementary Notes**

25 **Note S1: Light-to-work energy conversion efficiency**

26 The light-to-work energy conversion efficiency ( $\eta$ ) can be given by:

27 
$$\eta = \frac{E_{\text{out}}}{E_{\text{in}}} \quad (1)$$

28 where  $E_{\text{in}}$  is the incident light energy,  $E_{\text{out}}$  is mainly the elastic energy.

29 The  $E_{\text{in}}$  and  $E_{\text{out}}$  were calculated by the following equations:<sup>1</sup>

30 
$$E_{\text{in}} = PA t \quad (2)$$

31 
$$E_{\text{out}} = \frac{E h l w^3}{24 \kappa^{-2}} \quad (3)$$

32 where  $P$  is the light intensity (800 mW cm<sup>-2</sup>),  $A$  is the surface area of the PP/CB  
33 actuator infiltrated with ethanol (0.38 cm<sup>2</sup>),  $t$  is the response time (0.167 s).  $E$  is the  
34 modulus (0.28 MPa).  $h$ ,  $l$ ,  $w$ , and  $\kappa$  is the thickness (148.5  $\mu\text{m}$ ), length (10.62 cm),  
35 width (0.36 cm), and curvature (7.3 cm<sup>-1</sup>), respectively. All the parameters used in the  
36 calculations were obtained after the PP/CB film was immersed in ethanol. The  
37 incident light energy and elastic energy are calculated to be about 51 mJ and 0.46 mJ,  
38 respectively. So that the energy conversion efficiency is about 0.9%.

39 **Note S2: Natural frequency of the PP/CB oscillators**

40 The natural resonant frequency  $f$  of the PP/CB film was defined as follows:<sup>2</sup>

41 
$$f = \frac{\alpha^2}{2\pi} \sqrt{\frac{EI}{\rho A l^4}} = \frac{\alpha^2}{2\pi} \sqrt{\frac{\frac{1}{12} E w h^3}{\rho w h l^4}} = \frac{\alpha^2}{4\pi} \sqrt{\frac{E h^2}{3 \rho l^4}} \quad (4)$$

42 
$$I = \frac{1}{12} w h^3, \quad A = w h \quad (5)$$

43 In the equation (1),  $\alpha$  is 1.875, which depends on the oscillation mode.  $I$ ,  $E$  and  $A$   
44 represent the moment of inertia, modulus and sectional area of the film. Besides, the  $l$ ,  
45  $w$ , and  $h$  represent the length, width and height of the film immersed with or without  
46 ethanol, respectively. The  $\rho$  are calculated to be about 0.13 and 0.67 g cm<sup>-3</sup>, when the  
47 100  $\mu\text{m}$  film was immersed with or without ethanol, and the calculated oscillation  
48 frequency is about 3.9 and 6.3 Hz. When the film generates oscillation under NIR  
49 irradiation, the obtained experimental frequency is between 3.3 and 6 Hz, having a  
50 good agreement with the theoretical data.

51

52 **Supplementary figures**

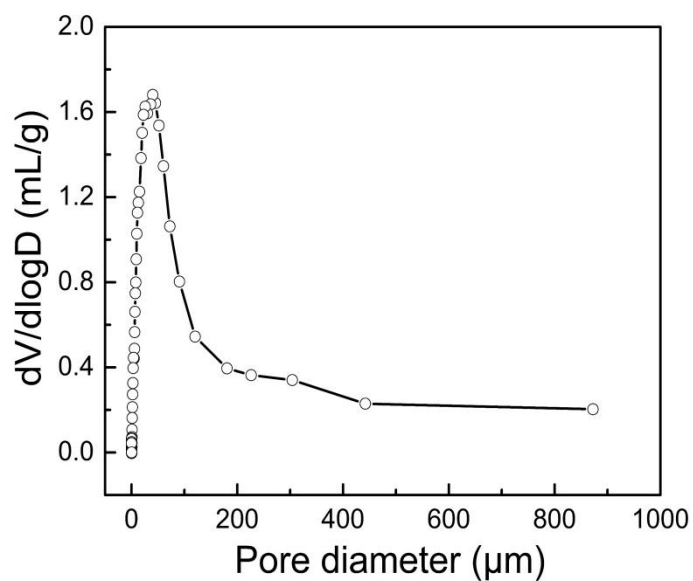

53

54 **Supplementary Fig. 1.** Pore size distribution of the porous PP/CB film measured by  
55 the mercury intrusion method.

56

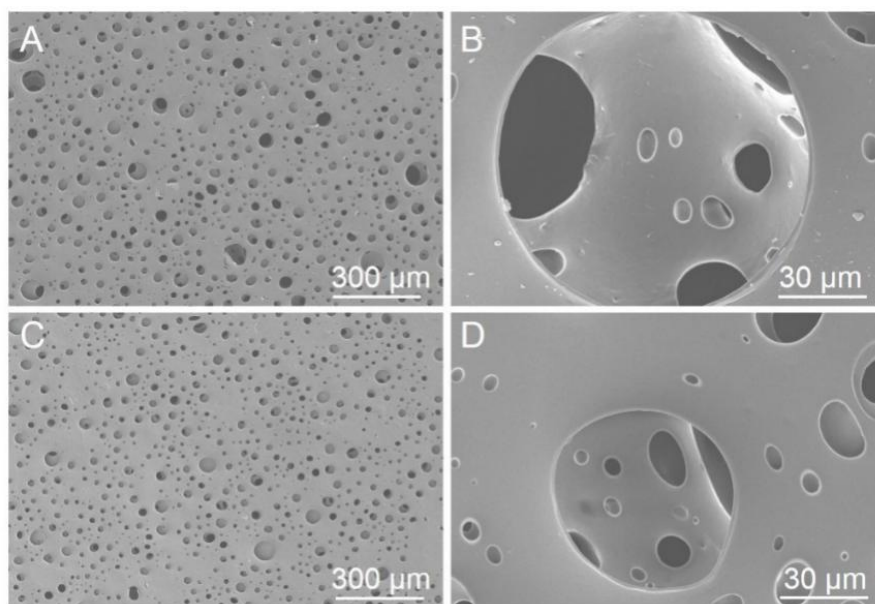

57

58 **Supplementary Fig. 2.** Low and high magnifications for the porous PP/CB film with  
59 thickness of 60  $\mu\text{m}$  (A, B) and 150  $\mu\text{m}$  (C, D).

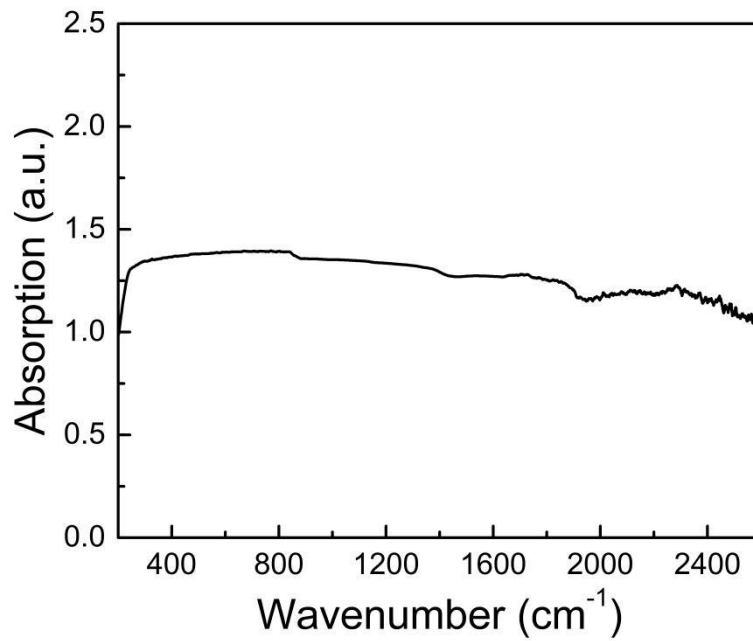

60

61 **Supplementary Fig. 3.** Absorption spectra of the PP/CB film.

62

63

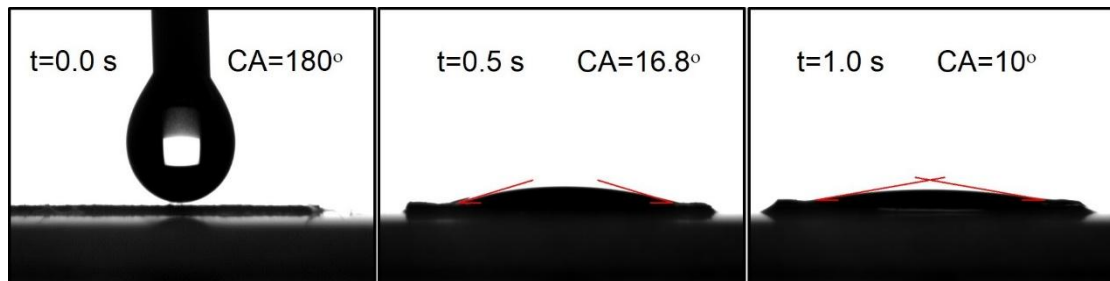

64

65 **Supplementary Fig. 4.** Photographs at different time during contact angle  
 66 measurement by dropping ethanol on the porous PP/CB film with thickness of 100  
 67  $\mu\text{m}$ .

68

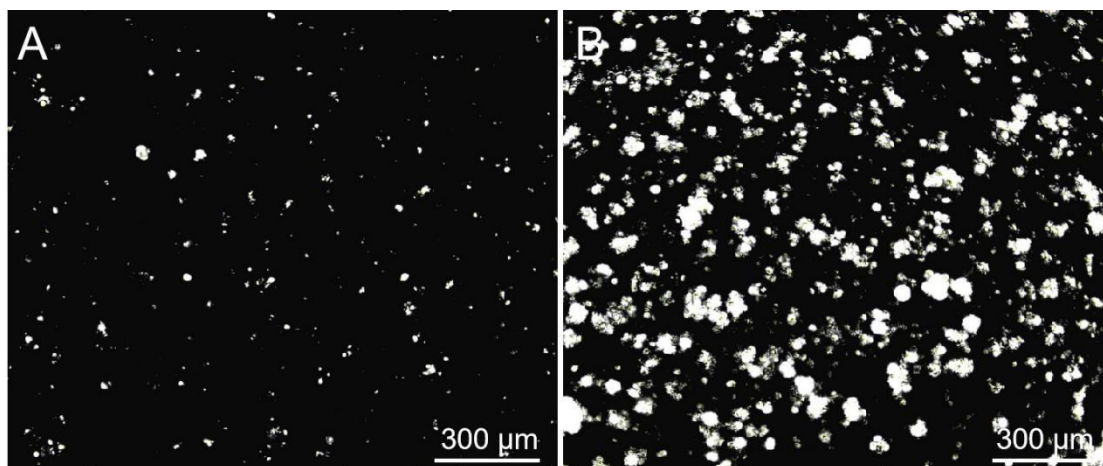

69

70 **Supplementary Fig. 5.** Optical images of the porous PP/CB film before (A) and after  
71 (B) infiltrated with ethanol.

72

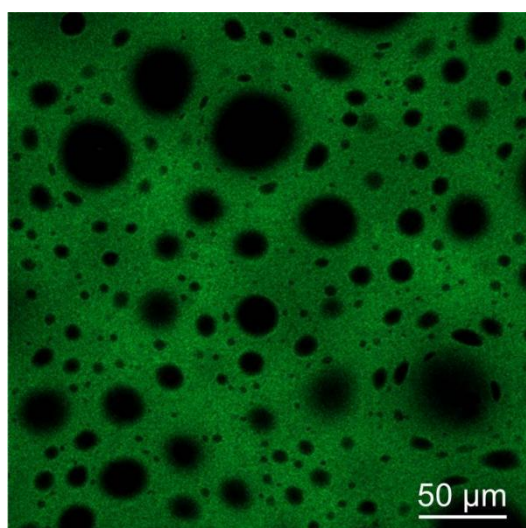

73

74 **Supplementary Fig. 6.** Fluorescent image of the 100 μm thickness porous PP/CB  
75 film infiltrated with rhodamine/ethanol solution ( $0.5 \text{ mg mL}^{-1}$ ).

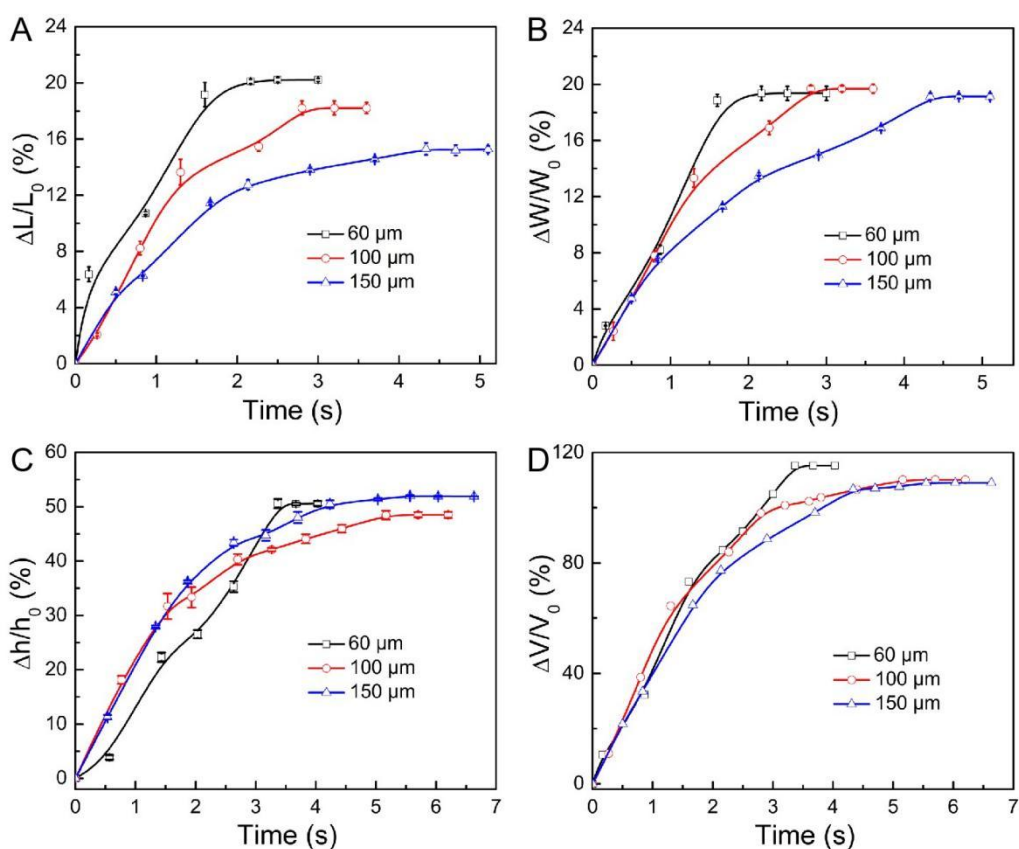

76

77 **Supplementary Fig. 7.** Change ratio in length (A), width (B), thickness (C), and  
 78 volume (D) as a function of time for the porous PP/CB film with different thickness  
 79 by absorbing ethanol. The original size of the PP film is 3 cm × 1 cm × 100 μm. Error  
 80 bars denote the standard deviation.

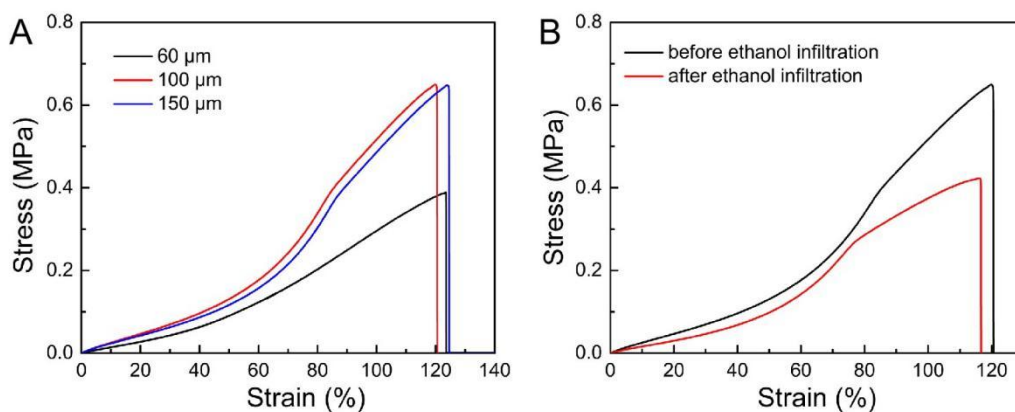

81

82 **Supplementary Fig. 8.** Stress-strain curves for the porous PP/CB film (A) with  
 83 different thickness, and (B) before and after infiltration of ethanol. The stretch rate is  
 84 0.5% s<sup>-1</sup>. The original size of the PP film is 2 cm × 1 cm × 100 μm.

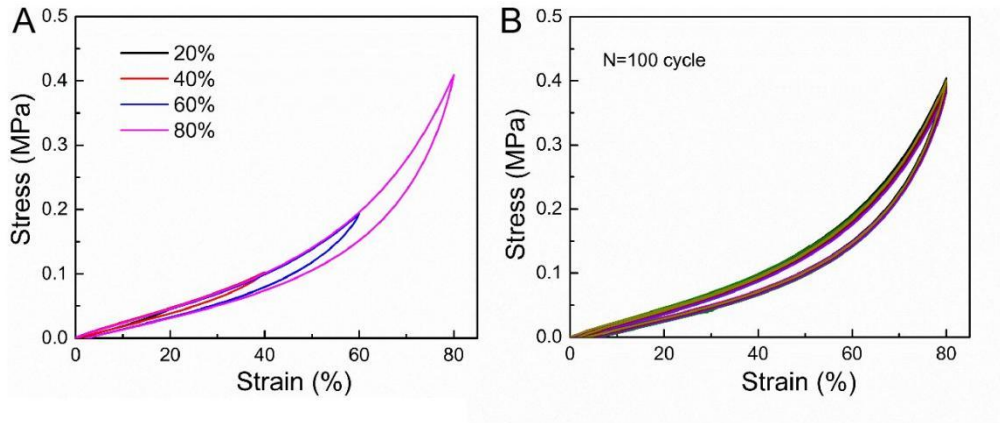

85

86 **Supplementary Fig. 9.** Stress-strain curves with progressively increasing strain (A)  
 87 and cyclic stress-strain tests (B) for the porous PP/CB film. The stretch rate is 0.5 %  
 88  $s^{-1}$ . The original size of the PP/CB film is 2 cm  $\times$  1 cm  $\times$  100  $\mu m$ .

89

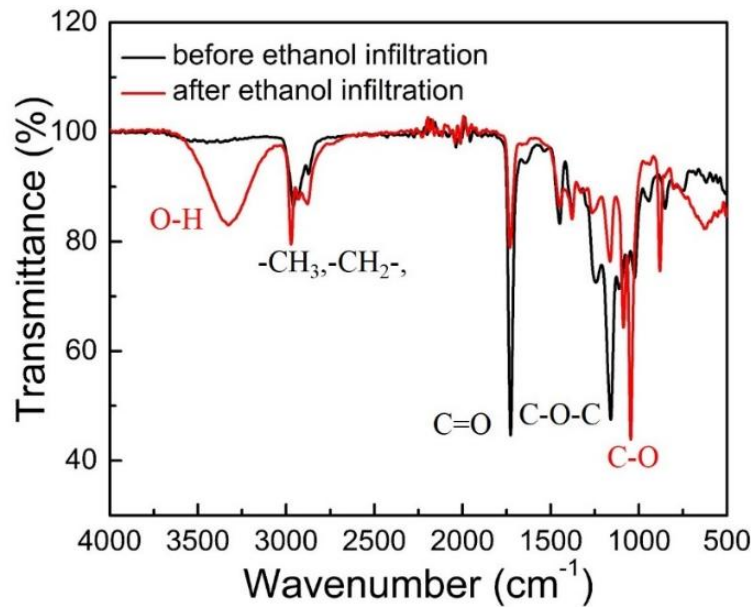

90

91 **Supplementary Fig. 10.** FTIR spectra for the porous PP/CB film before and after  
 92 ethanol filtration.

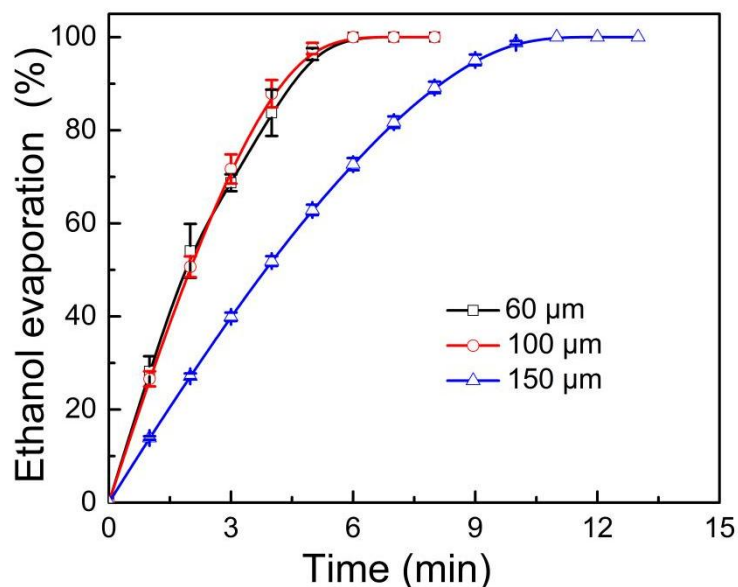

93  
 94 **Supplementary Fig. 11.** Mass percent of the ethanol evaporation for the porous PP  
 95 film infiltrated with ethanol as a function of time in open air. Error bars denote the  
 96 standard deviation.

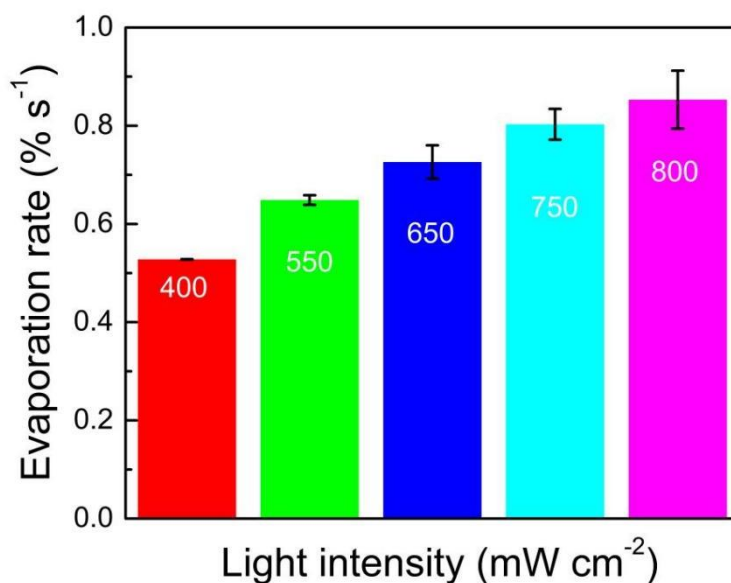

97  
 98 **Supplementary Fig. 12.** Ethanol evaporation rate for the 100 μm thickness porous  
 99 PP/CB film under different light intensities. The evaporation rate ( $v$ ) was calculated  
 100 by the percent mass decrease for the porous PP film infiltrated with ethanol divided  
 101 by the time during complete ethanol evaporation.  $v = m_{PP} / ((m_{PP} + m_{ethanol}) \cdot t)$ , where  
 102  $m_{PP}$ ,  $m_{ethanol}$ , and  $t$  are the mass of dry porous PP film, the mass of the ethanol for full  
 103 infiltration, and the time for complete ethanol evaporation. Error bars denote the  
 104 standard deviation.



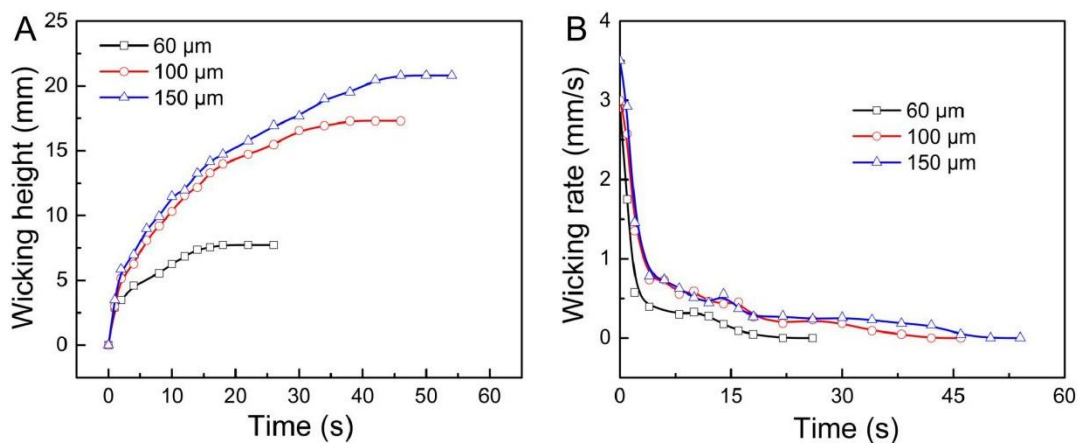

105 .

106 **Supplementary Fig. 13.** Wicking height (A) and wicking rate (B) as a function of  
 107 time for the porous PP/CB film with different thickness. The original length and width  
 108 of the film are 5 cm × 1 cm.

109

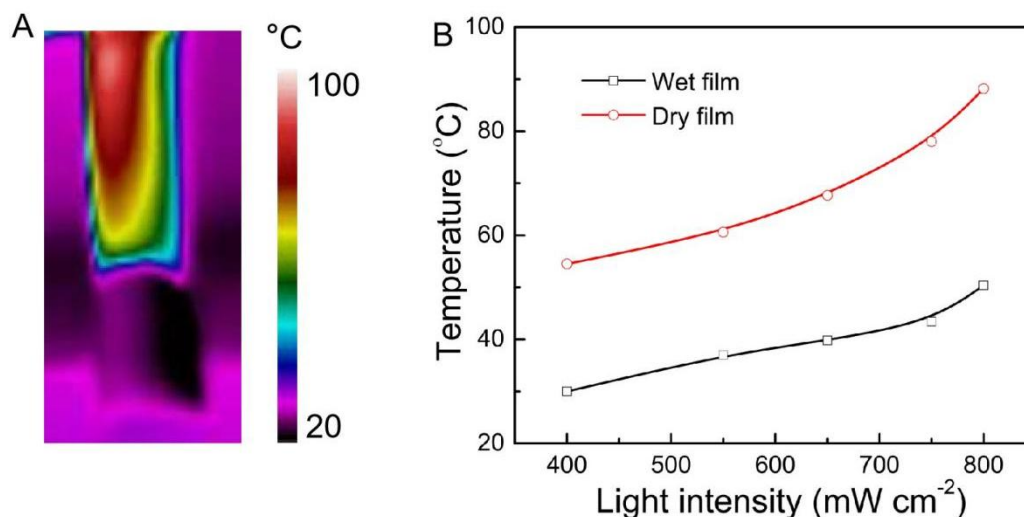

110

111 **Supplementary Fig. 14.** (A) Infrared image of the PP/CB film when infiltrated with  
 112 ethanol and reached the maximum wicking height at under 800 mW cm<sup>-2</sup> NIR light.  
 113 (B) Surface temperature of the wet PP/CB film with ethanol infiltration and dry film  
 114 without ethanol infiltration at different light intensities.

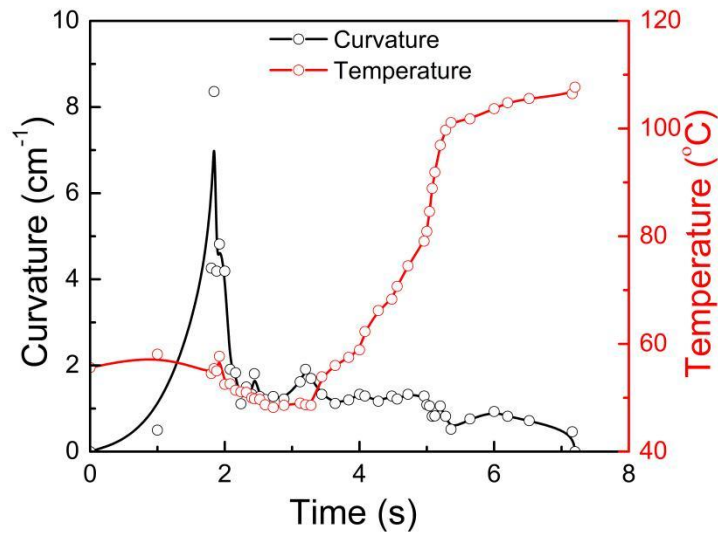

115  
 116 **Supplementary Fig. 15.** Curvature and temperature as a function of time when the  
 117 100  $\mu\text{m}$  thickness PP/CB film infiltrated with ethanol was irradiated by 800  $\text{mW cm}^{-2}$   
 118 NIR light at a tilt angle of  $90^\circ$ . The original length and width of the film are 9 mm  $\times$  3  
 119 mm.

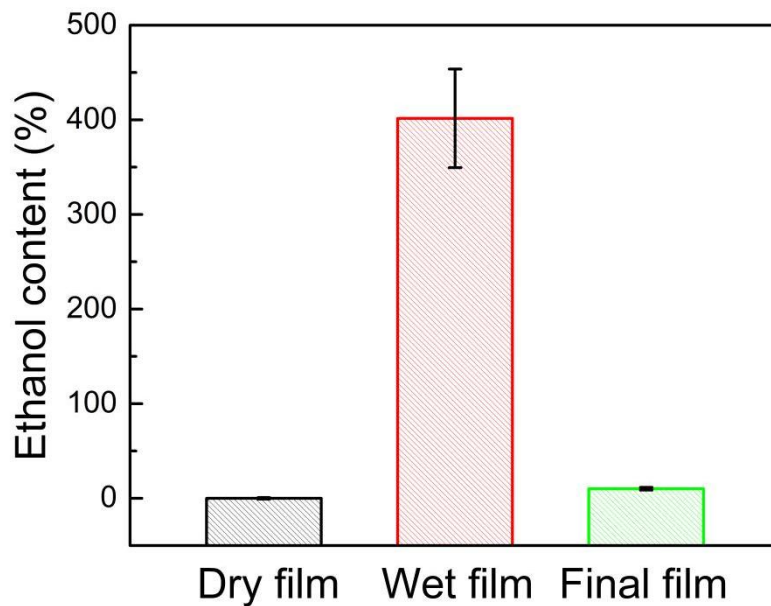

120  
 121 **Supplementary Fig. 16.** Ethanol content of the 100  $\mu\text{m}$  thickness PP/CB film at  
 122 different states (Dry film indicated the film without ethanol infiltration; Wet film  
 123 indicated the film with saturated ethanol infiltration; Final film indicated the film  
 124 stopped actuating under NIR light). The original length and width of the film are 9  
 125 mm  $\times$  3 mm. Error bars denote the standard deviation.

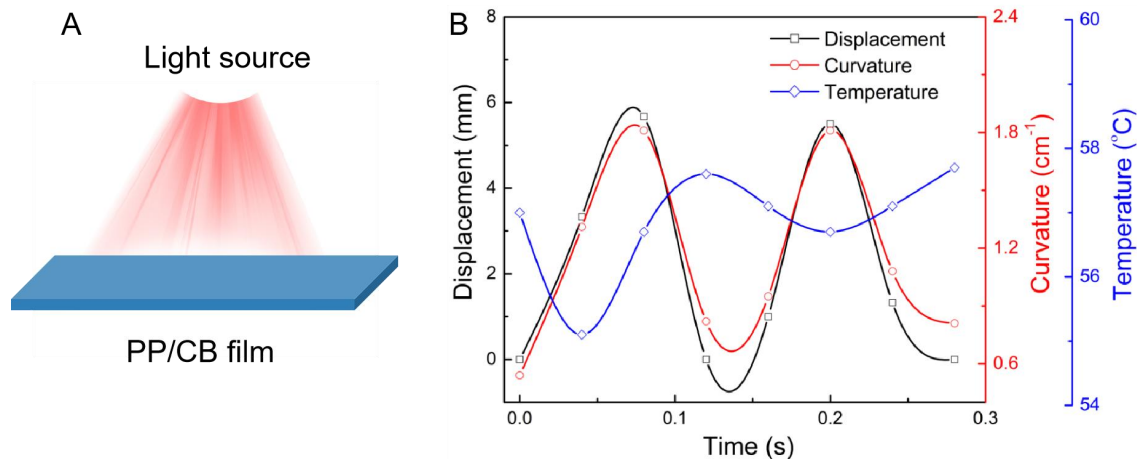

126

127 **Supplementary Fig. 17.** Schematic illustration of the horizontally placed film  
 128 irradiated vertically by light (A) and Displacement, curvature, and temperature as a  
 129 function of time for the horizontally placed PP/CB film under  $800 \text{ mW cm}^{-2}$  NIR light  
 130 at a tilt angle of  $90^\circ$  (B).

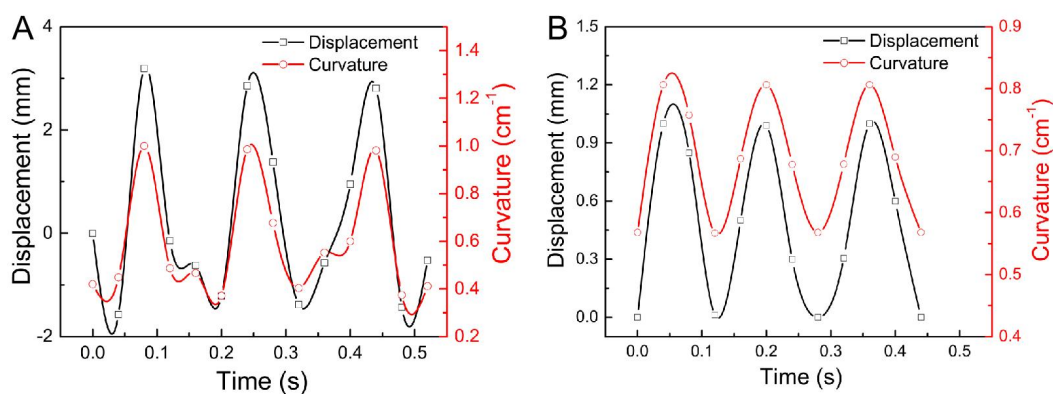

131

132 **Supplementary Fig. 18.** Displacement, and curvature as a function of time for the  
 133 horizontally placed PP/CB film under  $800 \text{ mW cm}^{-2}$  NIR light at a tilt angle of  $45^\circ$  (A)  
 134 and  $0^\circ$  (B).

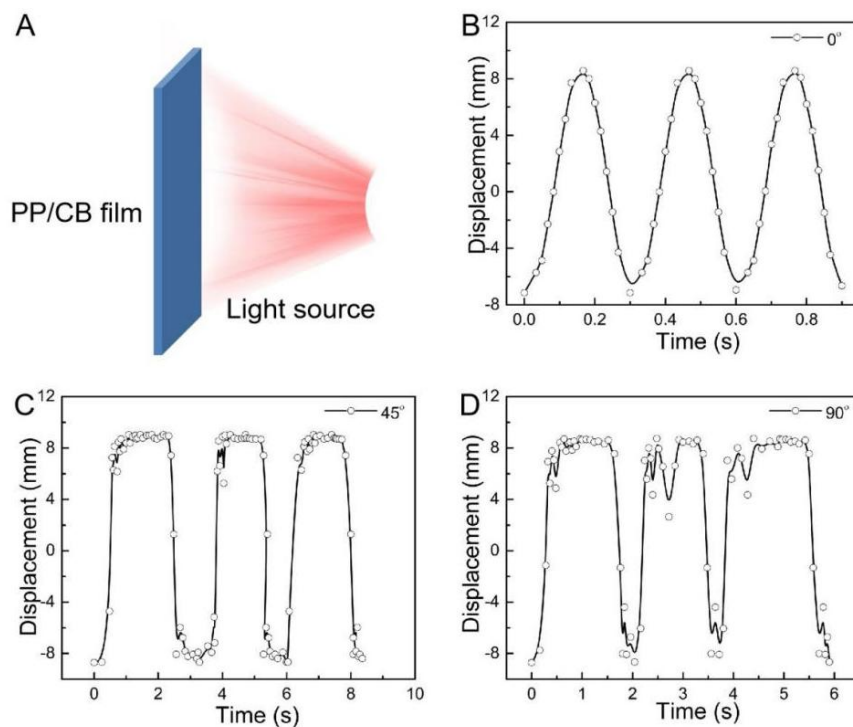

135

136 **Supplementary Fig. 19.** Schematic illustration of the vertically placed film irradiated  
 137 vertically by light (A) and Displacement as a function of time for the actuator film  
 138 with 90° tilt angle film under 800 mW cm<sup>-2</sup> NIR light at a tilt angle of 0° (B), 45° (C),  
 139 and 90° (D).

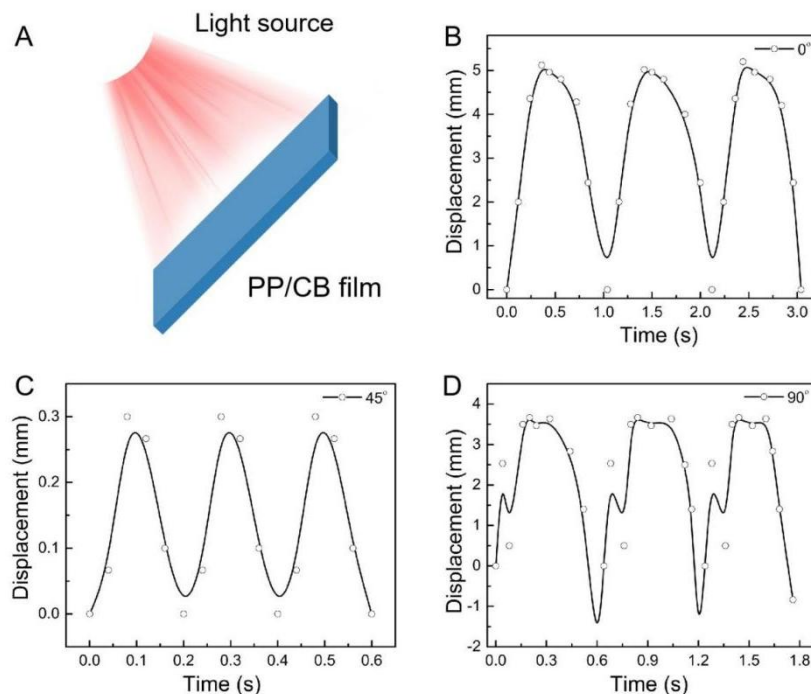

140

141 **Supplementary Fig. 20.** Schematic illustration of the film with 45° tilt angle  
 142 irradiated vertically by light (A) and Displacement as a function of time for the  
 143 actuator film with 45° tilt angle film under 800 mW cm<sup>-2</sup> NIR light at a tilt angle of  
 144 0° (B), 45° (C), and 90° (D).

145

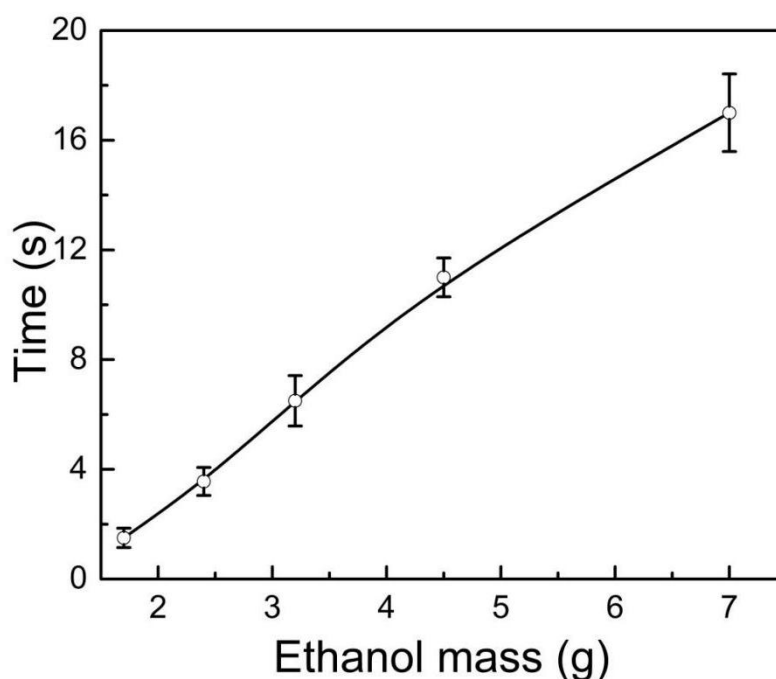

146

147 **Supplementary Fig. 21.** Time as a function of ethanol mass for the PP/CB film  
148 reaching to the stable oscillation. The vertically placed porous PP film with original  
149 size of 9 mm × 3 mm × 100 μm supplied with ethanol were used as the actuator. The  
150 vertically irradiated 800 mW cm<sup>-2</sup> NIR light were used for actuation by photothermal  
151 induced solvent irradiation. Error bars denote the standard deviation.

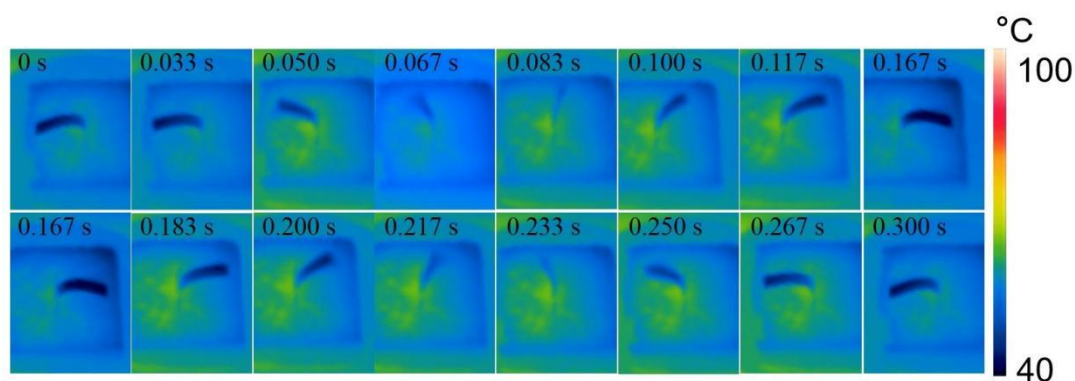

152

153 **Supplementary Fig. 22.** Infrared images at different time for the oscillating bending  
154 actuation. The vertically placed porous PP film with original size of 9 mm × 3 mm ×  
155 100 μm supplied with ethanol were used as the actuator. The vertically irradiated 800  
156 mW cm<sup>-2</sup> NIR light were used for actuation by photothermal induced solvent  
157 irradiation. If not specified, the same size and configuration of the actuator, and the  
158 same light intensity and irradiation angle were used in the following oscillating  
159 actuation experiments.

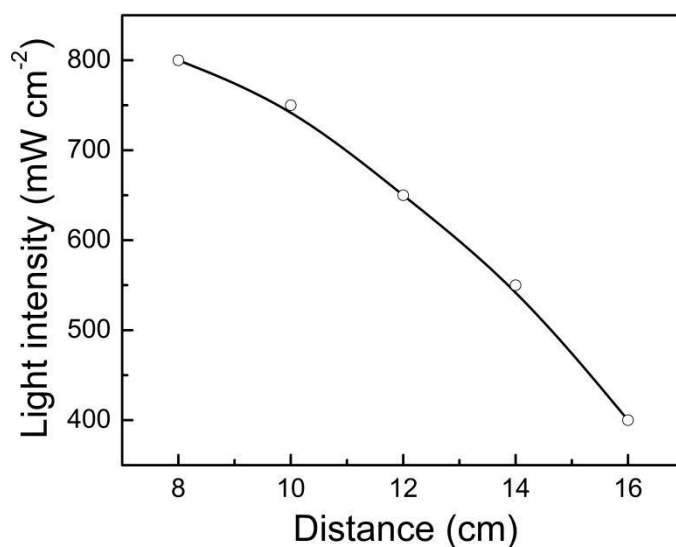

160

161 **Supplementary Fig. 23.** Light intensity as a function of distance of the actuator under  
 162 NIR light.

163

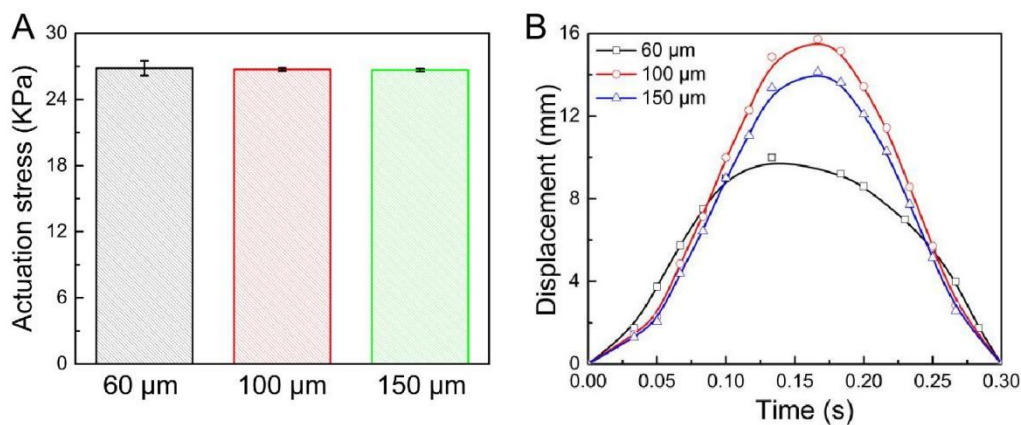

164

165 **Supplementary Fig. 24.** Actuation stress for the porous PP/CB film (2 cm × 1 cm)  
 166 with different thickness (A), and displacement as a function of time for the oscillating  
 167 bending actuation under NIR light with 800 mW cm<sup>-2</sup> for the porous PP/CB film with  
 168 different thickness (B). The original length and width of the film are 9 and 3 mm,  
 169 respectively. Error bars denote the standard deviation.

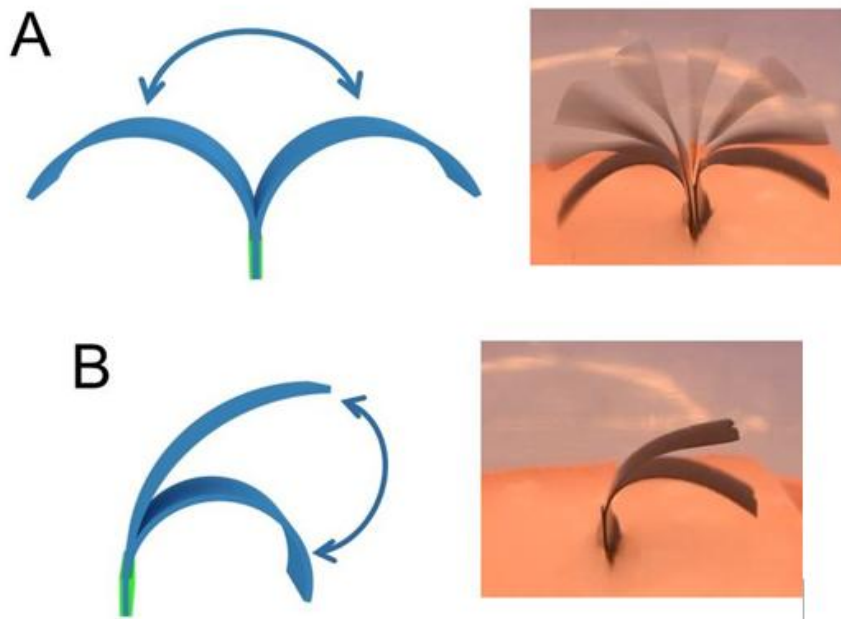

170

171 **Supplementary Fig. 25.** Schematic illustration (left) and photographs (right) for the  
 172 oscillating actuation under NIR light with  $800 \text{ mW cm}^{-2}$  (A) and  $400 \text{ mW cm}^{-2}$  light  
 173 intensities.

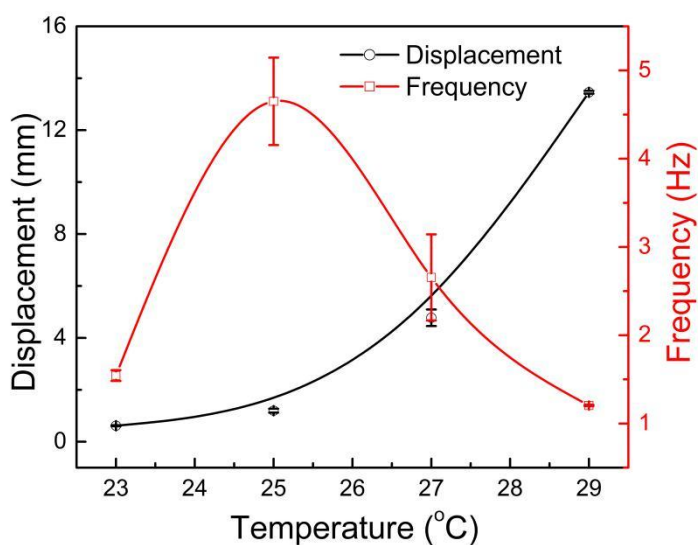

174

175 **Supplementary Fig. 26.** Displacement and actuation frequency of the PP/CB porous  
 176 film as a function of environmental temperature under NIR light with  $400 \text{ mW cm}^{-2}$ .  
 177 The size of the PP/CB film is  $9 \text{ mm} \times 3 \text{ mm} \times 100 \text{ }\mu\text{m}$ . Error bars denote the standard  
 178 deviation.

179

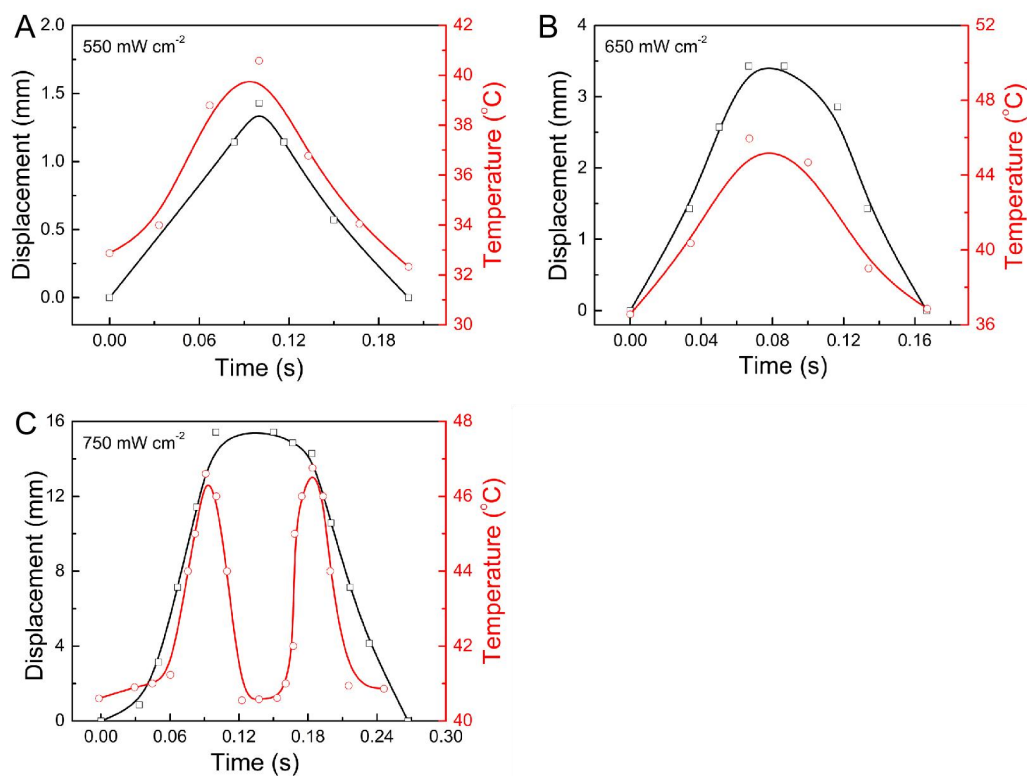

180

181 **Supplementary Fig. 27.** Displacement and maximum surface temperature as a  
 182 function of time for the oscillating bending actuation under NIR light with 550 mW  
 183 cm<sup>-2</sup> (A), 650 mW cm<sup>-2</sup> (B), and 750 mW cm<sup>-2</sup> (C).

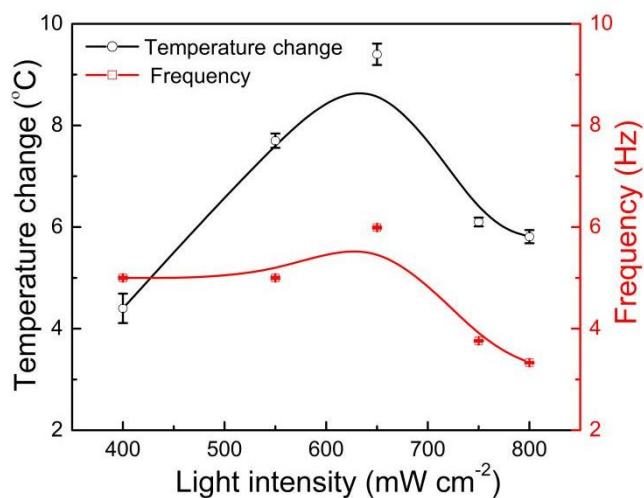

184

185 **Supplementary Fig. 28.** Temperature change and oscillating frequency of the  
 186 actuator as a function of light intensity. Error bars denote the standard deviation.



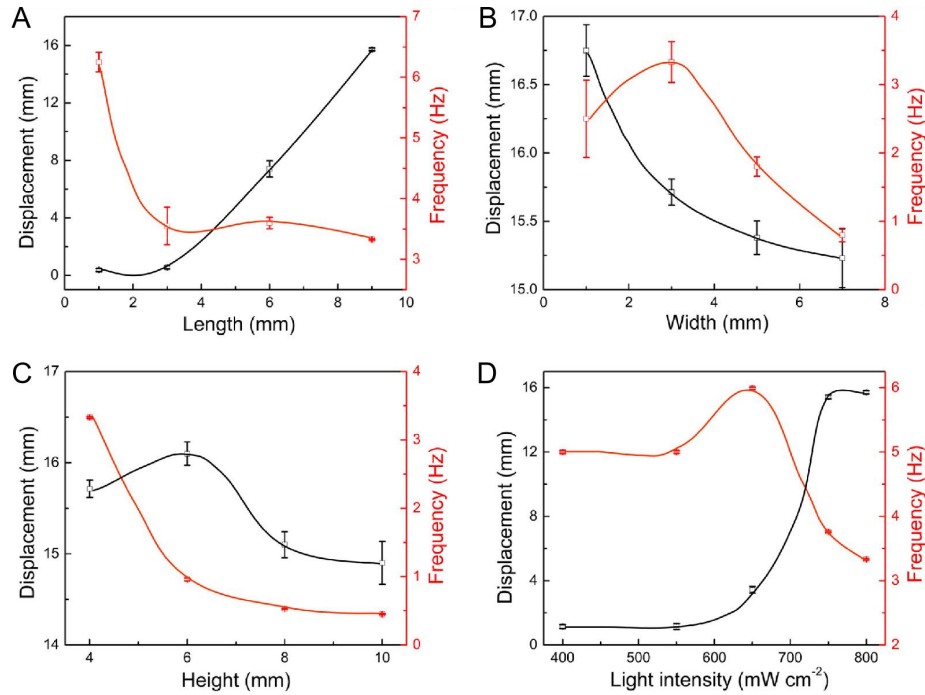

187

188 **Supplementary Fig. 29.** Displacement and oscillation frequency as a function of  
 189 actuating film with different lengths (A), widths (B), wetting heights of the solvent in  
 190 the film (C), light intensities (D). The original size of the PP/CB film is 9 mm  $\times$  3 mm  
 191  $\times$  100  $\mu\text{m}$ . Error bars denote the standard deviation.

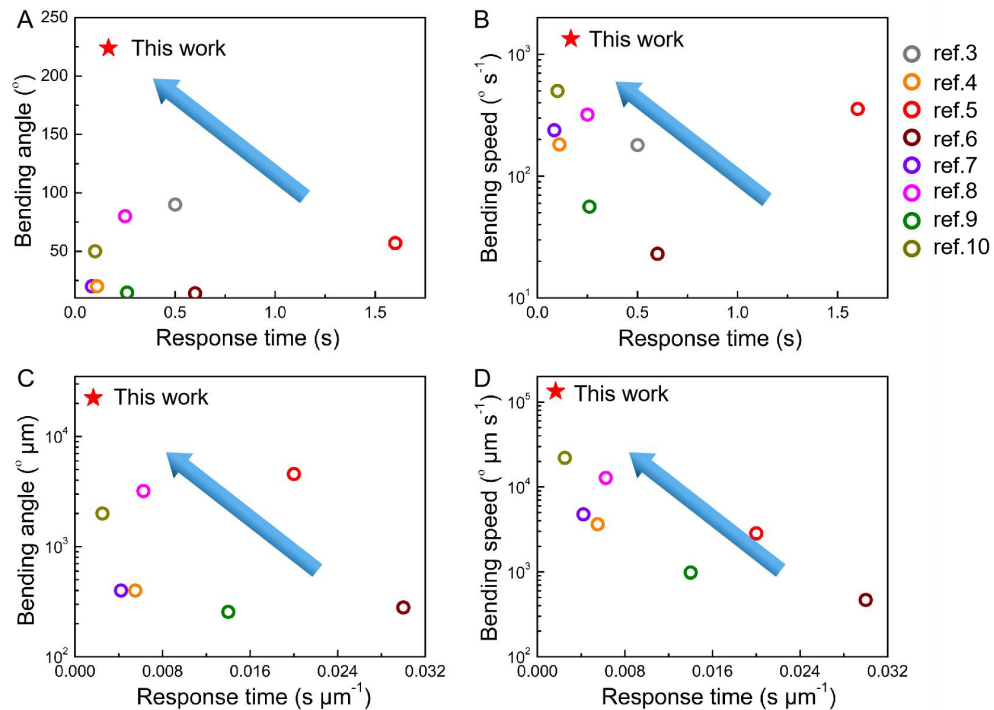

192

193 **Supplementary Fig. 30.** Comparison of the bending angle and response time,  
 194 bending speed and their values normalized with thickness with other oscillating  
 195 actuators.

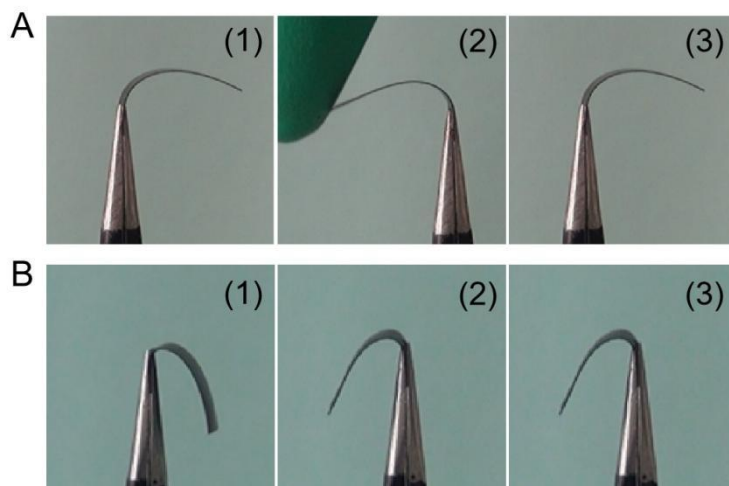

196  
 197 **Supplementary Fig. 31.** Photographs of the dry PP/CB film (A) and wet PP/CB film  
 198 infiltrated with ethanol (B) at different states. (1) the initial shape; (2) the bending  
 199 state under the external force of the finger; (3) the final state on removing the external  
 200 force.

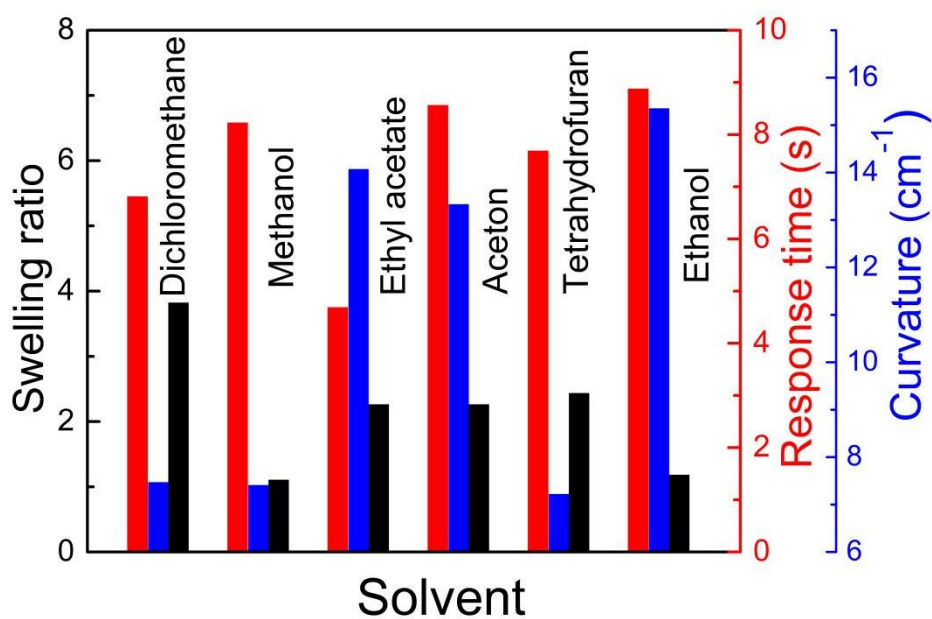

201  
 202 **Supplementary Fig. 32.** Swelling ratio, response time and curvature of the 100  $\mu\text{m}$   
 203 thick film in different solvent systems.

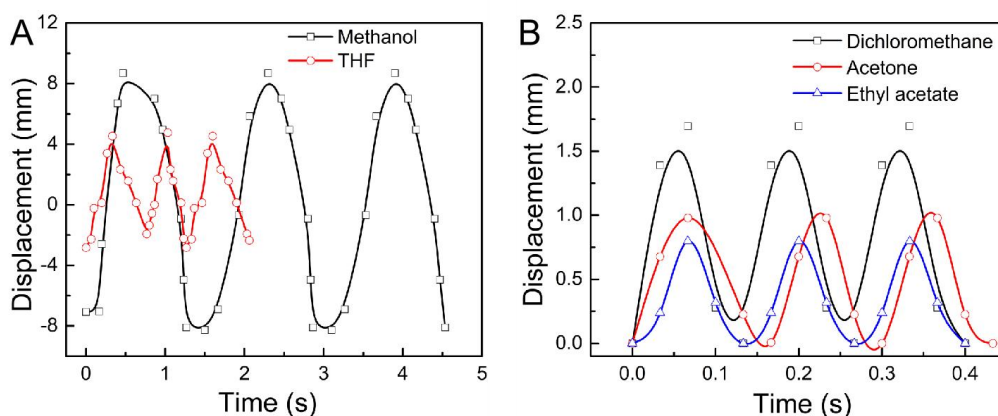

204

205 **Supplementary Fig. 33.** Displacement as a function of time for the oscillating  
 206 bending actuation under NIR light with different solvents supply, (A) methanol and  
 207 tetrahydrofuran (THF), (B) dichloromethane, acetone, and ethyl acetate.

208

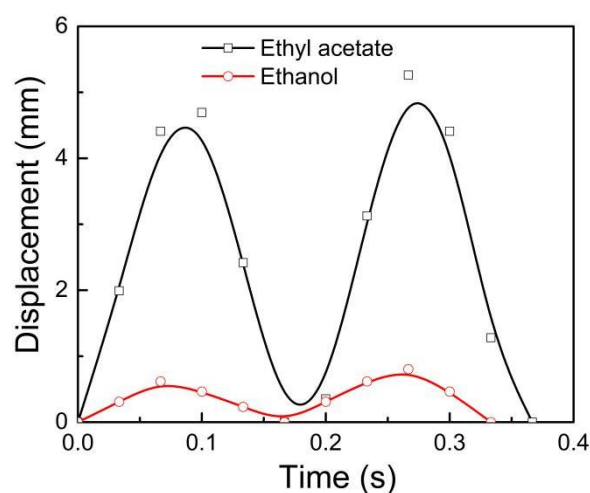

209

210 **Supplementary Fig. 34.** Displacement as a function of time for the porous PDMS  
 211 film under NIR light with ethanol and ethyl acetate supply. The original dimension of  
 212 the film is 5 mm × 2 mm × 35 μm.

213

214

215

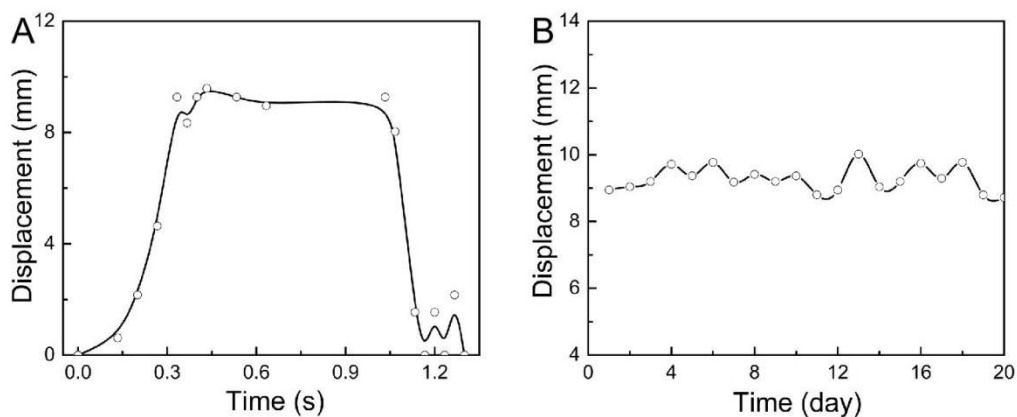

216

217 **Supplementary Fig. 35.** Displacement as a function of time for the porous PP/CB  
 218 film under the intense light with an irradiation temperature of about 36 °C (A) and the  
 219 performance stability test for 20 days (B).

220

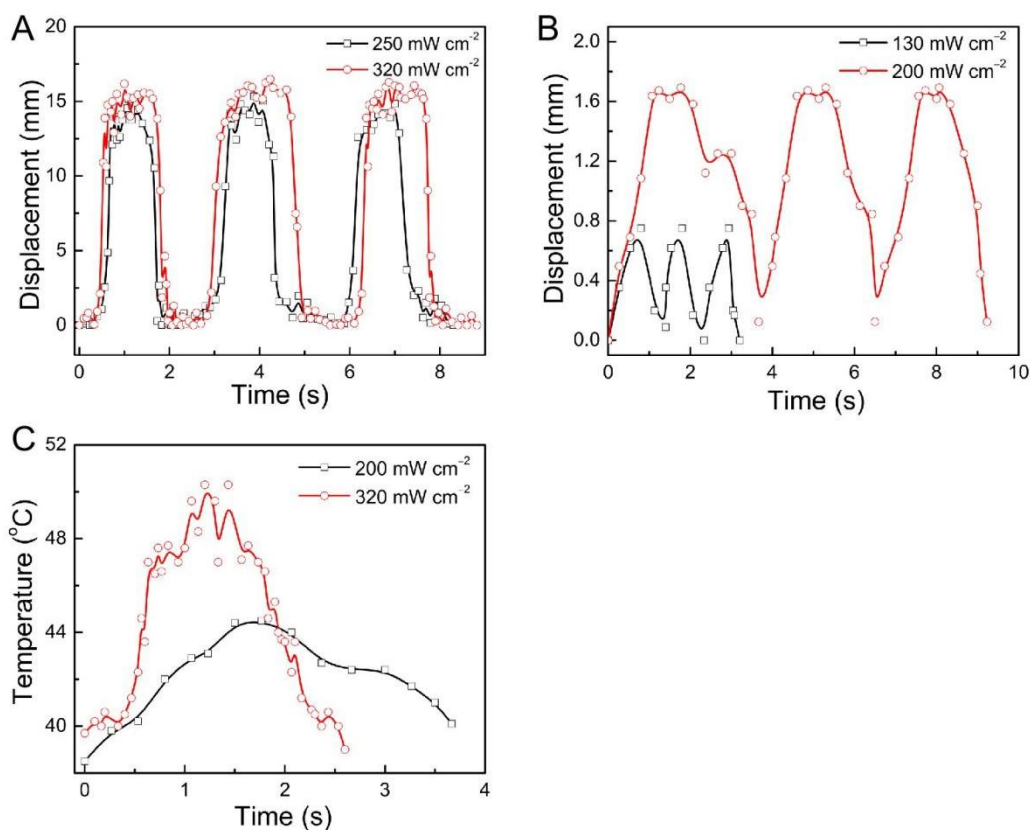

221

222 **Supplementary Fig. 36.** Displacement as a function of time for the oscillating  
 223 bending actuation under Xe lamp at different light intensities, (A) 250 mW cm<sup>-2</sup> and  
 224 320 mW cm<sup>-2</sup>, (B) 130 mW cm<sup>-2</sup> and 200 mW cm<sup>-2</sup>. (C) Temperature as a function of  
 225 time for the oscillating bending actuation under Xe lamp at 200 mW cm<sup>-2</sup> and 320  
 226 mW cm<sup>-2</sup>.

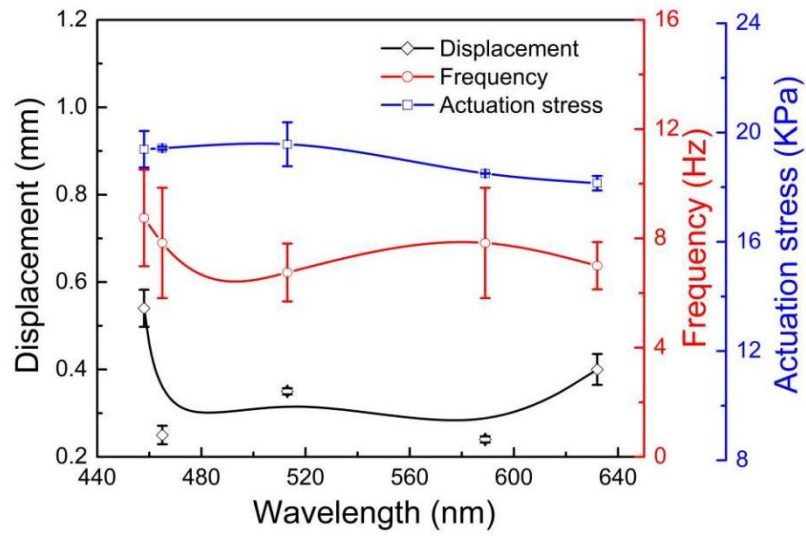

227

228 **Supplementary Fig. 37.** Displacement, actuation frequency, and actuation stress as a  
 229 function of incident light wavelength. Error bars denote the standard deviation.

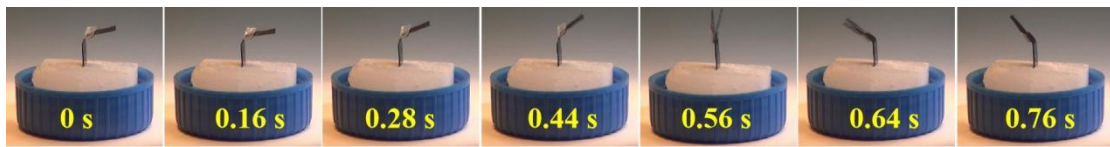

230

231 **Supplementary Fig. 38.** Photographs of the oscillating actuation at different time by  
 232 carrying 1.9-times load. The original size of the PP/CB is 9.5 mm length and 5 mm  
 233 width.

234 **Supplementary Table 1.** Comparison of the light-induced oscillating bending  
 235 actuation of this work with those of typical photo-induced oscillators.

| Materials                                                   | PP/CB<br>(this work) | AuNPs-<br>PNIPAM <sup>3</sup> | F-azo <sup>6</sup> | LC<br>Photonic <sup>8</sup> | CNT/PDMS <sup>5</sup> | PDA-LCN <sup>4</sup> | Azo-LCN-Kapton <sup>9</sup> | M1-LCN <sup>10</sup> |
|-------------------------------------------------------------|----------------------|-------------------------------|--------------------|-----------------------------|-----------------------|----------------------|-----------------------------|----------------------|
| Light source                                                | NIR                  | Laser                         | 532 nm             | Visible                     | White                 | NIR                  | 365 nm                      | UV                   |
| Light intensity<br>(mW cm <sup>-2</sup> /mW)                | 800/-                | -/500                         | 35/-               | 100/-                       | 330/-                 | 2500/-               | 100/-                       | 200/-                |
| Thickness <i>d</i> (μm)                                     | 100                  | -                             | 20                 | 40                          | 80                    | 20                   | 17.5                        | 40                   |
| Curvature $\kappa$ /angle $\theta$<br>(cm <sup>-1</sup> /°) | 7.3/224°             | 1.1/90°                       | 0.2/14°            | 0.7/80°                     | 0.8/57°               | 0.3/20°              | 0.25/14.6°                  | 0.35/50°             |
| $\kappa \times d$ (10 <sup>-4</sup> )                       | 730                  | -                             | 4                  | 28                          | 64                    | 6                    | 4.38                        | 14                   |
| Response time <i>t</i> (s)                                  | 0.167                | 0.5                           | 0.6                | 0.25                        | 1.6                   | 0.11                 | 0.26                        | 0.1                  |
| $\theta \times d$ (° μm)                                    | 22400                | -                             | 280                | 3200                        | 4560                  | 400                  | 255.5                       | 2000                 |
| <i>t/d</i> (s μm <sup>-1</sup> )                            | 0.00167              | -                             | 0.03               | 0.00625                     | 0.02                  | 0.0055               | 0.0149                      | 0.0025               |
| $\kappa/t$ (cm <sup>-1</sup> s <sup>-1</sup> )              | 43.7                 | 2.2                           | 0.33               | 2.8                         | 0.5                   | 2.73                 | 0.96                        | 3.5                  |
| $\theta/t$ (° s <sup>-1</sup> )                             | 1341                 | 180                           | 23.3               | 320                         | 356.25                | 182                  | 56.15                       | 500                  |
| $\kappa \times d/t$ (10 <sup>-4</sup> s <sup>-1</sup> )     | 4371                 | -                             | 6.7                | 112                         | 40                    | 54.5                 | 16.8                        | 140                  |
| $\theta \times d/t$ (° μm <sup>-1</sup> s <sup>-1</sup> )   | 134131               | -                             | 466.7              | 12800                       | 2850                  | 3636                 | 982.7                       | 22000                |
| Displacement (mm)                                           | 15.7                 | 0.5                           | 3.08               | -                           | 13.9                  | 6.7                  | -                           | -                    |
| D/L                                                         | 1.74                 | 0.029                         | 0.193              | -                           | 1.1                   | 0.67                 | -                           | -                    |
| T <sub>max</sub> (°C)                                       | 48.5                 | 34.3                          | 31                 | 84.6                        | 99                    | 60                   | 37                          | -                    |
| ΔT (°C)                                                     | 5.8                  | 3.7                           | 7                  | 58.7                        | 29                    | 35                   | 2.9                         | -                    |
| Frequency (Hz)                                              | 6                    | 0.9                           | 0.7                | 0.15                        | 0.3                   | 9                    | 2.2                         | 5                    |
| Divergent light                                             | Yes                  | Yes                           | No                 | No                          | No                    | No                   | Yes                         | No                   |
| Local light                                                 | No                   | No                            | Yes                | Yes                         | Yes                   | Yes                  | Yes                         | Yes                  |

236 Au NP-PNIPAM: gold nanoparticles-poly(*N*-isopropylacrylamide); F-azo: ortho-Fluor  
 237 azobenzene; LCN: liquid crystal polymer network; CNT: carbon nanotube; PDMS:  
 238 polydimethylsiloxane; PDA: polydopamine.

239 **Supplementary References**

- 240 1. Han B. et al. Reprogrammable soft robot actuation by synergistic magnetic and  
241 light fields. *Adv. Funct. Mater.* **32**, 2110997 (2021).
- 242 2. Gelebart, A. H., Vantomme, G., Meijer, E. W. & Broer, D. J. Mastering the  
243 photothermal effect in liquid crystal networks: a general approach for  
244 self-sustained mechanical oscillators. *Adv. Mater.* **29**, 1606712 (2017).
- 245 3. Zhao, Y. S. et al. Soft phototactic swimmer based on self-sustained hydrogel  
246 oscillator. *Sci. Robot.* **4**, eaax7112 (2019).
- 247 4. Lan, R. C. et al. Near-infrared photodriven self-sustained oscillation of  
248 liquid-crystalline network film with predesignated polydopamine coating. *Adv.*  
249 *Mater.* **32**, 1906319 (2020).
- 250 5. Yang, L. L. et al. An autonomous soft actuator with light-driven self-sustained  
251 wavelike oscillation for phototactic self-locomotion and power generation. *Adv.*  
252 *Funct. Mater.* **30**, 1908842 (2020).
- 253 6. Kumar, K. et al. A chaotic self-oscillating sunlight-driven polymer actuator. *Nat.*  
254 *Commun.* **7**, 11975 (2016).
- 255 7. Gelebart, A. H., Vantomme, G., Meijer, E. W. & Broer, D. J. Mastering the  
256 photothermal effect in liquid crystal networks: a general approach for  
257 self-sustained mechanical oscillators. *Adv. Mater.* **29**, 1606712 (2017).
- 258 8. Wei, W. Y., Zhang, Z. W., Wei, J., Li, X. F. & Guo, J. B. Phototriggered selective  
259 actuation and self-oscillating in dual-phase liquid crystal photonic actuators. *Adv.*  
260 *Optical Mater.* **6**, 1800131 (2018).
- 261 9. Wang, J. C., Song, T. F., Zhang, Y. H., Liu, J. G., Yu, M. M. & Yu, H. F.  
262 Light-driven autonomous self-oscillation of a liquid-crystalline polymer bimorph  
263 actuator. *J. Mater. Chem. C* **9**, 12573 (2021).
- 264 10. Sun, J., Hu, W., Zhang, L. Y., Lan, R. C., Yang, H. & Yang, D. K. Light-driven  
265 self-oscillating behavior of liquid-crystalline networks triggered by dynamic  
266 isomerization of molecular motors. *Adv. Funct. Mater.* **31**, 2103311 (2021).
