# Supplementary material for: Oscillating light engine realized by photothermal solvent evaporation
Source: PubMed Central journal article supplement (PMC9509359; doi:10.1038/s41467-022-33374-x), 2022-09-24
Supplement: 41467_2022_33374_MOESM3_ESM.pdf [file 41467_2022_33374_MOESM3_ESM.pdf]

## **Description of Additional Supplementary Files**

### **File Name: Supplementary Movie 1.**

Description: Oscillating bending actuation of the vertically placed porous PP film. The original size of the actuator was  $9\text{ mm} \times 3\text{ mm} \times 100\text{ }\mu\text{m}$ . The actuator was supplied with ethanol and under vertically irradiated  $800\text{ mW cm}^{-2}$  NIR light. The maximum bending curvature and oscillating displacement are  $7.3\text{ cm}^{-1}$  and  $15.7\text{ mm}$ , respectively.

### **File Name: Supplementary Movie 2.**

Description: Oscillating bending actuation of the vertically placed porous PP film carrying a load 6-times its own mass. The original size of the actuator was  $9.5\text{ mm} \times 5\text{ mm} \times 100\text{ }\mu\text{m}$ . The actuator was supplied with ethanol and under vertically irradiated  $800\text{ mW cm}^{-2}$  NIR light. The maximum specific work and specific power are  $12.02 \times 10^{-5}\text{ J g}^{-1}$  and  $2 \times 10^{-4}\text{ W g}^{-1}$ , respectively.
